# Supplementary material for: Parental Cognitions and Motivation to Engage in Psychological Interventions: A Systematic Review
Source: Springer Nature journal article supplement (doi:10.1007/s10578-018-0852-2), 2018-11-14
Supplement: MOESM1 [file 16271880]

**Supplementary Material**

**Table 1 -** Description of included studies

| **Study**  Authors, Date  Origin | **Sample***  Community (COM)  Clinical (CLI); Community-Risk (COM-RISK);  Ordered (ORD);  n participants  Children’s Age  Low SES | **Intervention**  Group (G) Individual (I),  Distance (D) | **Predictors**-  Perceived Child Problems (PCP)  Parents’ Perception of Parenting (PP)  Attributions of Problems (AT)  Self-Efficacy (SE)  Perceived benefits/Treatment Expectations (PB/TE)  Perceived Obstacles (PO)  Motivation to Change (MC) | **Outcomes** –  Attendance (AT),  Completion or Drop out (CDO);  Parent Participation Engagement (PPE), | **Results*** |
| --- | --- | --- | --- | --- | --- |
| Abrahamse, Niec, Junger, Boer, & Lindauer (2015)  USA | CLIN  n= 40 parents and their child  Families with a child referred for behaviour problems  2-7 years | I  Parent_Child Interaction Therapy– 18 sessions | PCP = Eyberg Child Behaviour Inventory: Intensity and Problem subscales | CDO= Completers and non-completers (parents who participated in at least one session but did not conclude treatment) | There were no significant differences between completers and dropouts regarding perceived child externalizing problems at pre-intervention. |
| Baker & Sanders (2017)  Australia | COM  n= 100 parents  2-9 years | D  Positive Parenting Program (Triple P)– Online Brief – 5 parent modules | PCP = Eyberg Child Behaviour Inventory: Intensity and Problems subscales  PP = Parenting Scale: Total dysfunctional parenting practices | CDO= Completers and non-conpleters (parents who completed at least the introductory module plus one of the exemplar modules) and non-completers | Parents’ completion of the program was not significantly associated with perceived child externalizing problems and dysfunctional parenting at pre-intervention. |
| Baydar, Reid, &Webster-Stratton (2003)  USA | COM  n= 607 mothers of children enrolled in Head Start  Pre-school  Low SES | G  Incredible Years Parenting Training Program – 8 to 12 sessions | PP = Parenting Practices Interview: harsh/negative, supportive/positive, inconsistent/ineffective parenting | PPE= Engagement based on three items -number of sessions attended by the mother, percentage of homework assignments completed; mother’s level of engagement in each session evaluated by the group´s leader | Parents’ participation engagement was significantly and positively associated with higher levels of harsh/ negative and inconsistent/ineffective parenting, but also higher levels of supportive/positive parenting at pre-intervention. |
| Bloomquist, August, lee, Piehler, & Jensen (2012)  USA | COM-RISK  n= 246 mothers and their child  Families with a child displaying elevated levels of aggression  Kindergarten through second grade students  Low SES | I & G  Two intervention conditions: Early Risers Program - Centre model - 10 sessions + Family support contacts and Early Risers Program - Outreach Model - number of sessions based on the level of need | PCP = Externalizing composite scale of the Behavioral Assessment System for Children, Parent Rating Scales  PP = Parenting Relationship Questionnaire: Discipline practices and Relational frustration subscales  MC = Parent Views of Intervention Questionnaire: Parent Motivation and Parent-Focused Expectations scale  PO= subscale of Anticipated Barriers and Obstacles of the Parent Views of Intervention Questionnaire | AT = Frequency of Family-Focused Contacts and Number of Minutes | Parents' attendance was positively associated with more perceived child externalizing problems, higher levels of perceived consistent discipline, more parent motivation and parent focused expectations at pre-intervention. Parents’ attendance was not significantly associated with anticipated barriers at pre-intervention.  In the final regression model, parent motivation with parent-focused expectations for the intervention was the strongest predictor of parent´s attendance. |
| Calam, Sanders, Miller, Sadhnani, & Carmont (2008)  UK | COM  n= 154 parents  2-9 years | D  Triple P- Media intervention -5 to 6 episodes | PCP = Eyberg Child Behavior Inventory: Intensity and Problem subscales  PP = Parenting Scale: Total dysfunctional parenting practices | AT = Episode viewing | Parents who watched all the series perceived more externalizing problems in children at preintervention. Episode viewing was also positively associated with more positive parenting style at pre-intervention, but in the final model this dimension lost its significant effect. |
| Chacko, Wymbs, Rajwan, Wymbs, & Feirsen (2017)  USA | CLIN  n= 40 single mothers and their children  Families with a child with ADHD  5-12 years | G  Behavioral Parent Training plus Group-Based Social Skills Program for Children– 9 sessions | AT = Children’s Attribution Style Questionnaire-Parent Version: More adaptive (i.e., more external, situational, speciﬁc) attribution style to positive events minus more depressive (i.e., more internal, stable, global) attribution style to negative events  SE = Parenting Sense of Competence Scale–Efﬁcacy Subscale: Efﬁcacy subscale | CDO = three categories -enrolled in but never attended BPT; dropped out during BPT, and completed BPT. | Mothers who never attended therapy were more likely to have lower parental efﬁcacy and greater inadequate attributions regarding their child at pre-intervention compared to parents who dropped out from therapy and those who completed therapy. |
| Chen & Forston (2015)  Taiwan | CLIN  n = 44 parents and their child  3-11 years | G  Parent–Child Interaction Therapy - 25 sessions | PCP = Eyberg Child Behaviour Inventory: Intensity and Problems subscales; Child Behavior Checklist: Externalizing problems | CDO= Completers and non-completers (parents who attended at least one treatment session but did not conclude treatment) | There were no significant differences between completers and dropouts concerning perceived child externalizing problems at pre-intervention. |
| Danko, Garbacz, & Budd (2016)  USA | CLIN  n= 52 parents and their child  Families with a child referred for behaviour problems  2-7 years | I  Parent_Child Interaction Therapy – 21 sessions | PCP = Eyberg Child Behaviour Inventory: Intensity subscale | CDO= Completers and non-completers (parents who participated in at least one session but did not conclude treatment) | There were no significant differences between completers and dropouts concerning perceived child externalizing problems at pre-intervention. |
| Davidson & Fristad (2006)  USA | CLIN  n= 29 primary caretaker and secondary caretakers and their children  Families with a child with a primary mood disorder  8- to 11-years | G  Multi-Family Psychoeducation Groups - 8 sessions. | PB/TE = The Treatment Beliefs Questionnaire: Total score evaluating health beliefs that favour the need for treatment | AT = Number of sessions attended  PPE = Measure of participation that included three items to evaluate the participation in and out-sessions activities | Parents’ participation engagement was not significantly associated with primary caretaker’s positive attitudes about treatment at pre-intervention.  Parents’ attendance was not significantly associated with beliefs about treatment at pre-intervention. |
| Dumas, Nissley-Tsiopinis, & Moreland (2007) | COM  n= 451 parents  3-6 years | G  Parenting Our Children to Excellence – 8 sessions | PCB = Disruptive Behavior Disorders, adapted to be answered by parents: attention deﬁcit/hyperactivity disorder and oppositional deﬁant disorder symptoms  PO = Obstacles to Engagement Scale: Personal or family stressors and obstacles; Relevance of and trust in the intervention; Intervention demands; Time and scheduling demands | AT = Number of sessions attended  PPE = Measure of participation during the session evaluated by one item completed independently by group leaders and assistants | Parents’ attendance was predicted by perceived obstacles, but not by perceived child problems at pre-intervention. Parents who reported fewer time and scheduling demands attended more sessions than parents who reported more demands on their time.  Parents´ participation engagement was not predicted by perceived child problems and perceived obstacles at pre-intervention. |
| Eisner & Meidert (2011) Switzerland | COM  n = 257  Grade 1 children | G  Triple P– 4 sessions | PCB = Social Behavior Questionnaire: Externalizing problem behavior subscale  PP = Alabama Parenting Questionnaire: Total score concerning the variety of problematic parenting practices. | CDO = Participation (in at least 1 session) vs No Show (enrolled but did not participated)  & Completers (completion of all of 4-sessions program) or non-completers  PPE = Adherence to techniques learned during the program reported by parents evaluated by 13 items (P2) and classified in two categories; Participation and Utilization (those who attended at least one session and used more than 7 techniques) | Parents´ completion of the program and parents’ participation engagement was not significantly associated with perceived child externalizing problems and parenting problems at pre-intervention. |
| Garvey, Julion, Fogg, Kratovil, & Gross (2006)  USA | COM  n= 156 parents  2-4 years  Low SES | G  The Chicago Parent Program – 11 sessions | PCP = Eyberg Child Behavior Inventory: Intensity and Problem subscales  SE = Toddler Care Questionnaire,TCQ : Self-efﬁcacy in managing situations relevant to raising young children | AT = percent of weekly parent groups attended. | Higher attendance was associated with lower parenting self-efﬁcacy and more parent reported child externalizing problems at pre-intervention. |
| Kazdin  (1990)  USA | CLIN  n= 81 parents and their child  Families with a child referred for behavioral problems  7 -13 years | I  Parent Management Training and Child Cognitive Problem-Solving Skills Training - 16 sessions | PCP = Child Behavior Checklist,CBCL: Total | CDO= two categories - premature termination (parents who dropped out with fewer than 25% of the sessions completed), completers (parents who completed more than 75% of the sessions). | There were no significant differences between completers and dropouts concerning child total problems perceived by parents at pre-intervention. |
| Kazdin & Mazurick (1994)  USA | CLIN  n= 257 parents and their child  Families with a child referred for behavioral problems  4 -13 years | I  Parent Management Training and Child Cognitive Problem-Solving Skills Training - 14 sessions | PCP = Child Behavior Check-List: Total; Interview to parents; Child history of anti-social behavior measures through the Risk Factor Interview  PP= Risk Factor Interview measuring adverse child rearing practices (harsh punishment, low monitoring, etc) | CDO= three categories -early dropouts (parents who completed up to six weeks of treatment), late dropouts (parents who completed 7-14 weeks of treatment), completers | Premature termination of treatment was predicted by perceived child's severity, perceived chronicity of anti-social behavior (evaluated trough the interview not the CBCL) and more adverse child rearing at pre-intervention. |
| Knox &Burkhart (2014)  USA | COM  n= 60 parents  1-9 years | G  ACT - Raising Safe Kids Program - 8 sessions | PP = Parent Behavior Checklist: Parents' nurturing behaviors and Negative discipline subscales; Parent–child Conflict Tactics Scale, to measure harsh parenting | CDO= two categories- dropouts and completers (parents that completed a minimum of seven of the eight ACT-RSK sessions) | There were no significant differences between completers and dropouts concerning perceived parenting at pre-intervention. |
| Lanier, Kohl, Benz, Swinger, Moussette, & Drake (2011)  USA | COM  n= 120 parents and their child  Child’s age not reported | I  Two intervention conditions: Parent–Child Interaction Therapy, office based or home based – 17 sessions | PCP = Eyberg Child Behaviour Inventory: Intensity and Problem subscales | CDO= three categories -early dropouts (parents who dropped out during the first phase of the treatment), late dropouts (parents who dropped out during the first phase of the treatment), completers | There were no significant differences between completers, early dropouts and late drop-outs in terms of perceived child externalizing problems at pre-intervention. |
| Lavigne, LeBailly, Gouze, Binns, Keller, & Pate (2010)  USA | CLIN  n= 86 parents  Families with a child referred for behavioral problems at a pediatric practice  3-6 years | G  Incredible Years Parenting Training Program – 12 sessions | PCP = Eyberg Child Behaviour Inventory: Intensity subscale; Child Behavior Check-List: Total subscale | CDO= two categories- dropouts and completers (parents that completed a minimum of seven sessions) | There were no significant differences between completers and drop-outs in terms of perceived child externalizing and total problems. |
| Leung, Sanders, Ip, & Lau (2006)  China | CLIN  n = 661  Child and families referred for child health services for child behavior problems, parenting problems or other psychosocial difficulties  2-12 years | G  Triple P– 4 sessions | PCP = Eyberg Child Behaviour Inventory: Intensity subscale  SE = Parenting Sense of Competence Scale: Total | CDO = two categories -completers (parents that participated in a minimum of 3 of the 4 sessions) and drop-outs | Completion status was not predicted by neither child externalizing problems or parents sense of competence at pre-intervention. |
| McWey, Holtrop, Stevenson, Wojciak, & Claridge (2015)  USA | ORD  n= 31 parents  Parents who were court ordered to participate in a parenting intervention due to child welfare system involvement  Ages not reported | G  Incredible Years Parenting Training Program – 12 sessions | PCP = Eyberg Child Behavior Inventory: Intensity and Problem subscales  PP = Parenting Practices Interview: Harsh and Inconsistent Discipline, Appropriate Discipline, Clear Expectations, Positive Verbal Discipline, Physical Punishment, Praise and Incentives | CDO = two categories -completers (parents that participated in a minimum of 8 of the 10 sessions) and others | Parents who did not complete the intervention perceived significantly more child externalizing problems and tended to perceive more harsh and inconsistent discipline compared to those who successfully completed the intervention. |
| Miller & Prinz (2003)  USA | CLIN  n= 124  Families with a boy referred for behavioral problems  5-9 years old | I  Three intervention conditions: Parent-only, Child cognitive-only, or Combined parent-child cognitive treatments  Enhanced Family Treatment- 24 sessions. | PCP = Child Behavior Checklist: Aggression and Total  PB/TE= Interview including the following questions: (a) "Why are you seeking treatment at this time?" and (b) "What do you hope to achieve from treatment?" categorized as internal or external locus of control | CDO= two categories - completers and dropouts (parents that not completed the entire protocol) | Early termination in the intervention conditions that involved the parents was predicted by parental externalizing pretreatment motivation, but not by the parents’ perception of child’s externalizing and total problems at pre-intervention.  Assignment to a treatment condition (e.g. parental only treatment) that did not match parents' incoming motivations (external motivation focusing on changing the child) was predictive of dropout from therapy, but only when families entered treatment with external motivations and not for mismatched families with internal motivations. |
| Nix, Bjerman, & McMahon (2009)  USA | COM  n= 445 parents  Parents almost all of low socioeconomic status (SES) who had children screened with severe conduct problems  1st-grade children -6 years | G  Fast Track Parent Parent Management Training Groups - 22 sessions | PCP = Oppositional and Aggressive Behavior Scale of the Parent Daily Report | AT = Percentage of sessions present  PPE = 5 items including the amount of participation in the parent group, the amount of participation in parent–child sharing time, the quality of participation in the parent group, the quality of participation in parent–child sharing time, and the completion of between-session homework. assignments. | Parents´ attendance and participation engagement was not predicted by perceived child externalizing problems at pre-intervention. |
| Nock, Ferriter, & Holmberg (2007)  USA | CLIN  n=76 parents and their child  Families with a child referred for behavioral problems  2-13 years  Low SES | I  Parent Management Training and Child Cognitive Problem-Solving Skills Training - 6 sessions | MC = Parent Motivation Inventory: Total score resulting from the sum of desire for the child to change, readiness to change and perceived ability to change  PB/TE = Credibility/Expectancies Questionnaire: beliefs about the credibility of treatment and parents’ expectations of improvement with treatment | PPE = Treatment Adherence Questionnaire (TAQ) - three items concerning quantity and qualityof parent adherence to the treatment procedures evaluated by the therapist and the parent.  AT = Total number of sessions attended. | The quantity (but not quality) of adherence to treatment procedures was significantly predicted by positive expectations concerning treatment.  Neither quantity or quality of adherence to treatment procedures were significantly predicted by parent motivation to change at pre-intervention.  Treatment attendance was not predicted by parent motivation at pre-intervention. However, there was a negative, medium-sized, statistically significant relation between treatment attendance and parent expectations at pre-intervention. |
| Nock & Kazdin (2001)  USA | CLIN  n= 405 parents and their child  Families with a child referred for behavioral problems  2-15 years | I  Parent Management Training and Child Cognitive Problem-Solving Skills Training – 16 sessions | PB/TE = Parent Expectancies for Therapy: Expectations concerning the credibility of therapy, the improvement as a result of treatment, and the parental involvement in treatment | AT = Number of sessions a family remained in the treatment  CDO = Two categories – premature termination (when parents stated that they want to discontinue treatment or failed three consecutive weeks) and non-premature termination | There was a curvilinear relationship between treatment attendance and premature termination and the parent expectations for therapy at pre-intervention. Parents with expectations that were very high or very low attended the greatest number of sessions and were least likely to terminate treatment prematurely. This association was significant even when the effects of family/parent/child characteristics were controlled for. |
| Orrell-Valente, Pinderhughes, Valente, Laird, & The conduct Problems Prevention Research Group (1999)  USA | COM-RSK  n=87 parents and their child  Families with a child with externalizing problems  Kindergarten to middle school  Low SES | G  Fast Track Parent Parent Management Training Groups– 17 sessions | PCP = Child Behavior Check-List: Externalizing and Internalizing problems subscales  SE= Parenting Sense of Competence Scale- revised | AT= parents’ attendance at sessions  PPE= six items rated by the family facilitator concerning the level of interest and involvement. | Parents’ attendance and participation engagement were not significantly associated with perceived child problems and self-efficacy at pre-intervention. |
| Pereira, Muris, mendonça, Barros, Goes, & Marques (2015)  Portugal | COM-RSK  n=50 parents and their child  Families with a child with a principal DSM-IV anxiety disorder  8- to 12-years-old | G  Friends for Life Program - Group CBT program that also included parental sessions -3 parent sessions | PCP = Screen for Child Anxiety Related Emotional Disorder; Children’s Anxiety Life Interference scale  PB = 1 item to evaluate expectancy of the efficacy of the intervention | PPE = The Parental Involvement in Therapy Scale (PITS) – four items rated by the clinician to evaluate communication with the clinician; parents’ support of their children’s homework activities; parents’ support of their children’s exposure exercises; parents’ sessions attendance.  P2 | Parents’ participation engagement was not significantly associated with perceived child anxiety problems, anxiety interference and expectancy concerning intervention efficacy at pre-intervention. |
| Peters, Calam, & Harrington (2005)  UK | CLIN  n = 75 parents  Families with a child referred for behavioral problems  3-10 years  Low SES | G  Parent Management Training – 10 sessions | PCP = Eyberg Child Behavior Inventory: Intensity and problem subscales  AT = Parents’ spontaneous causal attributions of their child’s problem behaviors were coded using the Leeds Attributional Coding System | AT =Number of sessions attended  CDO= 2 categories - completers  (parents who attended 50% or more sessions) or non-completers (parents that attended less than 50% of sessions) | Parents’ attendance and completion of the program were significantly associated with parents’ perceived control of their child’s behavior at pre-intervention but not with parents’ child-centered attributions (internal/external; personal-universal, stable-unstable). Mothers who attributed more control to themselves for the child’s behavior were more likely to attend to the sessions and complete the therapy.  Parents’ attendance and completion of the program were not associated with parents’ perception of child´s externalizing problems at pre-intervention. |
| Plueck, Freund-Braier, Hautmann, Beckers, Wieczorrek, & Doepfner (2010)  Germany | COM  n = 74  Families with a child with high externalizing problems  Pre-school children | G  Prevention Program for Externalizing Problems - Parent and teacher components – 10 sessions | PCP = Child Behavior Checklist– short versions of the externalizing and internalizing sub-scales | CDO= 2 categories - completers  (parents who attended 50% or more sessions) or non-completers (parents that attended less than 50% of sessions) | There were no significant differences between completers and non-completers concerning perceived child problems at pre-intervention. |
| Prinz & Miller (1994)  USA | CLIN  n = 147 parents  Families with a child referred for behavioral problems  4-9 years | I  Two intervention conditions: Parent Management Training or Enhanced Family Treatment – 21/22 sessions | PCP = Child Behavior Check-List: Total | CDO = two categories - completers and dropouts (parents that not completed the entire protocol) | There were no significant differences between completers and non-completers concerning perceived child problems at pre-intervention. |
| Roberts, Joe, & Rowe-Hallbert (1992)  USA | CLIN  n= 72 parents and their child  Families with a child referred for behavior problems  2-10 years | I  Helping the Non-Non-Compliant Child program – 8 sessions | SE = Parent Locus of Control Scale | CDO = three categories – dropout before the 1st session, premature dropout and completed therapy | Parents´ drop-out was not significantly associated with parents’ self-efficacy at pre-intervention. |
| Ryan, Boxmeyer, & Lochman (2009)  USA | COM-RSK  n=121 parents and their child  Families with a child with high levels of externalizing problems  9-12 years | G  Coping Power – child sessions + parent sessions – 10 parent sessions | PP = Alabama Parenting Questionnaire: parent's involvement in the child's life, positive parenting practices and parental monitoring subscales | AT =Number of sessions attended | Parents’ attendance was significantly and positively associated perceived positive parenting (positive practices and involvement) at pre-intervention. |
| Schneider, Gerdes, Haack, Lawton  (2013)  USA | CLIN  n = 73 parents and their child  Families with a child referred for behavioral problems  School aged children | I  Parent Management Treatment – 13 sessions | PCP = Disruptive Behavior Disorders Rating Scale: Inattentive, Hyperactive/ impulsive, Oppositional defiant disorder, and Conduct disorder symptoms | CDO= Dropout during treatment was defined as a family signing the treatment contract and completing at least one treatment session, but discontinuing treatment prior to completing the treatment | Parents’ dropout from treatment was not significantly predicted by perceived child externalizing problems at pre-intervention, with one exception. Treatment dropout was significantly predicted by severity of conduct disorders symptoms. |
| Stadnick, Haine-Schlagel, & Martinez (2016)  USA | CLIN  n = 18 parents and their child  Families with a child referred for behavioral problems  5-12 years | I  Non-manualized child-parent psychological treatment – at least 4 months of treatment | PCP = Eyberg Child Behavior Inventory: Intensity subscale  PM = Parent Motivation Inventory: Desire for child change, Readiness to change parenting behavior and Perceived ability to change parenting behaviors subscales | PPE = Parent Participation Engagement in Child Psychotherapy Observational Coding System – five items observational measure to evaluate speciﬁc in-session parent behaviors | Parents’ participation engagement was significantly associated with perceived child externalizing problems, and motivation to participate in therapy (ability, but not desire or readiness) at pre-intervention. |
| Topham & Wampler (2008)  USA | COM  n = 41 mothers and their child  2-10 Years | I  Filial therapy treatment – 10 sessions | PCP = Eyberg Child Behavior Inventory: Intensity subscale | AT = Number of sessions attended | Parent’s attendance was significantly and positively associated with perceived child externalizing problems at pre-intervention. |
| Wade & Andrade (2015)  Canada | CLIN  n= 37 parents  Families with a child referred for behavioral problems  9-12 years | G  Coping Power - 15 sessions | PM = Parent Readiness for Change Scale: Overall Readiness | AT = Number of sessions missed by parents | Parents reporting higher levels of readiness missed fewer treatment sessions. |
| Wells, Salari, & Sarkadi (2016)  Sweden | COM  n = 237 parents  4-5 years | G  Triple P- 3 seminars | PCP = Eyberg Child Behavior Inventory: Intensity subscale; Strengths and Difficulties Questionnaire: Emotional problems subscale  PP = Parenting Scale: Laxness and Overreactivity subscales | AT = Attendance at least to one session | Mothers’ attendance was significantly and positively associated with perceived externalizing problems (but not with internalizing) in their children at pre-intervention and with perceived overreactive behavior (but not laxness) when responding to their child’s misbehavior. For fathers, attendance was only significantly associated with child’s perceived internalizing problems (but not with child’s externalizing problems or parental negative practices) at pre-intervention. |
| Werba, Eyberg, Boggs, & Algina (2006)  USA | CLIN  n= 99 parents and their child  Families with a child referred for behaviour problems  3-6 years | I  Parent_Child Interaction Therapy – 14 sessions | PCP = Eyberg Child Behaviour Inventory: intensity and Problems subscales  SE = Parent Locus of Control Scale | CDO= Completers and non-completers (parents who did not conclude treatment) | There were no significant differences between dropouts and completers concerning perceived child externalizing problems and parent’s self-efficacy at pre-intervention. |
| Winslow, Bonds, Wolchik, Sander, & Braver (2009)  EUA | COM-RSK  n=266 mothers  Divorced mothers  9-12 years | G  Two intervention conditions: Only Parenting Group and Parenting and Child’s groups– 13 sessions | PCP = Child Behavior Check-List: Total score  PP =Composite score of three scales to evaluate Effective discipline | CDO= two categories –non-retained (mothers who enrolled in the intervention but did not attend any sessions or dropped out before the program was completed) or retained | Mothers’ retention in the program was not significantly associated with perceived child problems, mother’s effective discipline and mother-child relationship quality at pre-intervention. |

* Only described the sample and the results concerning the analysis or outcomes of interest.

Table 2. Methodological evaluation of the studies

| **Study**  First Author (Year) | **S1** | **S2** | **M1** | **M2** | **A1** | **A3** |
| --- | --- | --- | --- | --- | --- | --- |
| Abrahamse (2015) | 1 | 1 | 1 | 1 | 0 | NA |
| Baker (2017) | 1 | 1 | 1 | 1 | 0 | NA |
| Baydar.(2003) | 0 | 1 | 0 | 0 | 0 | 1 |
| Bloomquist (2012) | 1 | 1 | 1 | 1 | 0 | 1 |
| Calam (2008) | 1 | 1 | 1 | 1 | 0 | 1 |
| Chacko (2017) | 1 | 1 | 1 | 1 | 0 | 0 |
| Chen (2015) | 1 | 1 | 0 | 1 | 0 | NA |
| Danko (2016) | 1 | 1 | 1 | 1 | 0 | 1 |
| Davidson (2006) | 0 | 1 | 1 | 0 | 0 | 0 |
| Dumas (2007) | 1 | 1 | 0 | 1 | 0 | 1 |
| Eisner (2011) | 0 | 1 | 0 | 1 | 0 | 1 |
| Garvey (2006) | 1 | 1 | 1 | 1 | 0 | 0 |
| Kazdin (1990) | 1 | 1 | 0 | 1 | 0 | 1 |
| Kazdin (1994) | 1 | 0 | 0 | 1 | 0 | 1 |
| Knox (2014) | 1 | 1 | 1 | 1 | 0 | NA |
| Lanier (2011) | 0 | 0 | 0 | 1 | 0 | 1 |
| Lavigne (2010) | 1 | 1 | 0 | 1 | 0 | 1 |
| Leung (2006) | 1 | 1 | 1 | 1 | 0 | 1 |
| McWey (2015) | 1 | 0 | 1 | 1 | 0 | 0 |
| Miller (2003) | 1 | 1 | 0 | 1 | 0 | 0 |
| Nix (2009) | 1 | 1 | 1 | 1 | 0 | 1 |

| **Study**  First Author (Year) | **S1** | **S2** | **M1** | **M2** | **A1** | **A3** |
| --- | --- | --- | --- | --- | --- | --- |
| Nock (2007) | 1 | 1 | 1 | 0 | 1 | 1 |
| Nock (2001) | 1 | 0 | 1 | 1 | 0 | 1 |
| Orrell-Valente 1(999) | 1 | 1 | 0 | 1 | 0 | NA |
| Pereira (2015) | 1 | 1 | 0 | 1 | 0 | NA |
| Peters (2005) | 1 | 0 | 0 | 1 | 0 | 0 |
| Plueck (2010) | 0 | 1 | 1 | 1 | 0 | 1 |
| Prinz (1994) | 0 | 1 | 0 | 1 | 0 | 1 |
| Roberts (1992) | 0 | 0 | 1 | 1 | 0 | NA |
| Ryan (2009) | 1 | 0 | 0 | 1 | 0 | 1 |
| Schneider (2013) | 0 | 1 | 1 | 1 | 0 | 1 |
| Stadnick (2016) | 1 | 1 | 0 | 1 | 0 | 0 |
| Topham (2008) | 1 | 1 | 1 | 1 | 0 | 0 |
| Wade (2015) | 0 | 1 | 1 | 1 | 0 | 0 |
| Wells (2016) | 1 | 1 | 0 | 1 | 0 | 0 |
| Werba (2006) | 1 | 1 | 0 | 1 | 0 | NA |
| Winslow et al. (2009) | 0 | 1 | 0 | 1 | 0 | NA |

Note. S1- Description of relevant sample characteristics: 1 – all or all but one characteristics described; 0- more than one of the characteristics not described; S2 - Recruitment procedures adequately described: 1- description of the recruitment procedures: 0- description absent for more than one element; M1- Reliable measures of predictors: 1- reliability score reported and adequate, 0- reliability score not reported or not adequate for at least one of the measures; M2 - Reliable measure of parents’ engagement: 1- at least internal consistency for parents’ engagement measure reported and adequate or detailed description if objective measure, 0- reliability score not reported or not adequate; A1- Power calculation reported: 1- power calculation reported, 0- power calculation not reported; A2: relevant confounders adjusted for in analyses: 1- family adversity adjusted for in analysis, 0- relevant confounders not adjusted for in analysis., NA- Not applicable (relevant confounders not adjusted for in analysis but none of the predictors were significantly associated with engagement)
